36 **Abstract**

37

38 The environment where an embryo develops can be influenced by components of maternal origin,  
39 which can shape offspring phenotypes and therefore maternal fitness. In birds that produce more than  
40 one egg per clutch, females differ in the concentration of components they allocate into the yolk along  
41 the laying sequence. However, identification of processes that shape female yolk allocation and thus  
42 offspring phenotype still remains a major challenge within evolutionary ecology. A way to increase  
43 our understanding is by acknowledging that allocation patterns can differ depending on the level of  
44 analysis, such as the population *versus* the among-female (within-population) level. We employed  
45 mixed models to analyze at both levels the variation in allocation along the laying sequence of four  
46 steroid hormones, three antioxidants, and four groups of fatty acids present in the egg yolks of wild  
47 great tits (*Parus major*). We also quantified repeatabilities for each component to study female  
48 consistency. At a population level, the concentrations/proportions of five yolk components varied  
49 along the laying sequence, implying that the developmental environment is different for offspring  
50 developing in first *versus* last eggs. Females varied substantially in the mean allocation of components  
51 and in their plasticity along the laying sequence. For most components, these two parameters were  
52 negatively correlated. Females were also remarkably repeatable in their allocation. Overall, our data  
53 emphasize the need to account for female variation in yolk allocation along the laying sequence at  
54 multiple levels, as variation at a population level is underpinned by different individual patterns. Our  
55 findings also highlight the importance of considering both levels of analysis in future studies  
56 investigating the causes and fitness consequences of yolk compounds. Finally, our results on female  
57 repeatability confirm that analyzing one egg per nest is a suitable way to address the consequences of  
58 yolk resource deposition for the offspring.

59

60 Keywords: maternal effects, female allocation, phenotypic plasticity, reaction norm, repeatability,  
61 great tit, *Parus major*

62

## 63 Introduction

64

65 Female birds can influence the physiological conditions in which their embryos will develop by  
66 differential allocation of resources into the egg yolk, thus generating variation in offspring phenotype  
67 and influencing fitness (Mousseau and Fox 1998). Such resources can be hormones (Schwabl 1993)  
68 and nutrients (Surai 2002, Hulbert and Abbott 2011), which can affect embryonic growth and  
69 development and also provide protection to oxidative damage. In bird species that produce more than  
70 one egg per clutch, females often vary the concentration of components they allocate along the laying  
71 sequence (e.g., Royle et al. 1999, Blount et al. 2002, Hōrak et al. 2002, Saino et al. 2002, Tschirren et  
72 al. 2004, Bourgault et al. 2007, Rubolini et al. 2011, Lessels et al. 2016, Toledo et al. 2016). Hence,  
73 depending on the egg in which they develop, offspring from the same clutch can be exposed to  
74 different environments during embryonic development. Despite maternal effects being an important  
75 factor in evolution (Mousseau and Fox 1998), the identification of the processes that shape female  
76 yolk allocation still remains a major challenge in biology.

77 A way to increase our understanding of yolk allocation is by acknowledging that females can  
78 show different patterns of allocation along the laying sequence when analyzed at multiple levels  
79 (Meyers and Bull 2002). This phenotypic plasticity (defined as the property of a given genotype to  
80 produce different phenotypes as environmental conditions change; Via et al. 1995, Pigliucci 2001,  
81 Nussey et al. 2007) observed along the laying sequence can be analyzed at a population level by  
82 looking at the average female allocation of components along the laying sequence (Figure 1a). At a  
83 population level, consistent patterns of average yolk allocation along the laying sequence have been  
84 reported for several bird species. For example, domestic canaries (*Serinus canaria*) and black-headed  
85 gulls (*Chroicocephalus ridibundus*) increase the concentration of androgens, while zebra finches  
86 (*Taeniopygia guttata*) decrease the concentration of these components from the first to the last egg  
87 (reviewed by Groothuis et al. 2005, Gil 2008). This population-level variation, hereafter referred to as  
88 “mean phenotypic plasticity”, has been interpreted in light of sibling competition and parent-offspring  
89 conflict (Müller et al. 2007). However, a lack of consistency across populations of the same species  
90 has also been reported, for example in great tits (*Parus major*; Tschirren et al. 2004, Groothuis et al.  
91 2008, Lessels et al. 2016). This inconsistency indicates that the patterns of allocation are more  
92 complex than previously assumed.

93 Phenotypic plasticity in allocation patterns at a population level might not necessarily provide  
94 information regarding individual-level variation (Nussey et al. 2007, Dingemanse et al. 2010). The  
95 same pattern observed at a population level might be driven by females differing in the mean  
96 allocation of components (Figure 1b), in the slope of changes along the laying sequence (hereafter  
97 referred to as “individual phenotypic plasticity”; Figure 1c), or in both parameters which covary  
98 (Figure 1d). Mixed results across populations of the same species may therefore result from  
99 differences among females in allocation patterns within each population (Nussey et al. 2007,

100 Dingemanse et al. 2010). Individual female variation can be quantified by using a reaction norm  
101 approach, which allows us to estimate how much of each yolk component females transfer on average  
102 into the yolk (i.e., the elevation of the reaction norm), the change in female allocation along the laying  
103 sequence (i.e., individual phenotypic plasticity), as well as the covariation between elevation and slope  
104 (Nussey et al. 2007, Dingemanse et al. 2010, Dingemanse and Wolf 2013). In particular, the presence  
105 of correlations between the mean allocation of components and the individual phenotypic plasticity  
106 suggests that maternal effects cannot be fully evaluated by studying each of these components  
107 separately, since selection could be acting on each of these sources of variation and/or directly on their  
108 correlation. Since natural selection operates at the individual level, accounting for individual female  
109 variation (i.e., mean allocation, phenotypic plasticity and the correlation between these two  
110 parameters) in yolk allocation along the laying sequence is therefore of key importance if we aim to  
111 understand the evolutionary causes and consequences of variation in female allocation.

112 Here we employed linear mixed models to study the allocation along the laying sequence at  
113 both population- and among female-levels in the yolks of 11 clutches of freshly laid eggs collected  
114 from a wild population of great tits. Our emphasis in this investigation was to provide new insights  
115 into individual-level patterns. Furthermore, since the majority of research to date has focused on  
116 androgens, here we also aim at simultaneously quantifying additional yolk components to increase our  
117 understanding of the factors contributing to such differences in allocation patterns observed along the  
118 laying sequence. For each egg collected we measured the concentrations of four steroid hormones (the  
119 androgens androstenedione, 5 $\alpha$ -dihydrotestosterone, testosterone, and the glucocorticoid  
120 corticosterone), three antioxidants (vitamin E, lutein, zeaxanthin) and the proportions of four groups of  
121 fatty acids (saturated fatty acids, monounsaturated fatty acids, omega ( $\omega$ )-3 polyunsaturated fatty acids  
122 (PUFA),  $\omega$ -6 PUFA). We then quantified female consistency in allocation for each yolk component  
123 (e.g., whether females that allocate on average high levels of a yolk component always allocate high  
124 concentrations along the laying sequence compared to other females) by calculating adjusted  
125 repeatabilities.

126 We selected specific yolk components for our analysis because of possible interactive effects  
127 on offspring phenotype, although the statistical determination of such possible interactions is beyond  
128 the scope of the current study. Steroid hormones such as androgens and glucocorticoids can enhance  
129 offspring growth, competitive ability and survival, while also possibly causing immunosuppression  
130 and oxidative stress (Schwabl 1993, Groothuis and Schwabl 2002, Groothuis et al. 2005, Gil 2008,  
131 Groothuis and Schwabl 2008, Haussmann et al. 2012, Treidel et al. 2013). Conversely, antioxidants  
132 like the carotenoids and vitamin E can enhance the immune system and mitigate oxidative stress  
133 caused by embryo growth (Surai 2000, Saino et al. 2003, Yigit et al. 2014, Parolini et al. 2017, Watson  
134 et al. 2018). Fatty acids, in turn, provide the avian embryo with almost all the energy and building  
135 blocks required to sustain development within the egg (Noble and Cocchi 1990, Surai and Speake  
136 2008). In particular, PUFAs are vital components for the formation of cell membranes, heart

137 functioning and brain development (Hulbert and Abbott 2011). However, highly unsaturated PUFAs  
138 are susceptible to lipid peroxidation through reactive oxygen species that are generated by embryonic  
139 metabolism (Pamplona et al. 2002, Larsson et al. 2004, Hulbert and Abbott 2011, Yigit et al. 2014).  
140 Furthermore, we recorded lay date, ambient temperatures at the time of laying, and female body  
141 condition. Factors such as lay date and ambient temperature may explain the concentration/proportion  
142 of some yolk components, especially those known to be highly influenced by the quality and quantity  
143 of food consumed by the mother (antioxidants like vitamin E and carotenoids and PUFAs; Surai and  
144 Speake 2008; Hulbert and Abbott 2011). Internal variables such as female body condition are also  
145 usually considered important factors for determining the yolk allocation of substances like hormones  
146 (reviewed by Groothuis et al. 2005), antioxidants (Blount et al. 2002, Williamson et al. 2006) and fatty  
147 acids (Raclot 2003, Price et al. 2008).

148

149

## 150 **Methods**

151

### 152 **Study species, field site and sampling**

153 Great tits are small passerine birds that breed inside cavities. Females usually lay one egg each day  
154 early in the morning. While having a seed-dominated winter diet, great tits feed primarily on  
155 caterpillars during the breeding season (Royama 1970) which are an important source of proteins and  
156 fatty acids (Isaksson and Andersson 2007, Andersson et al. 2015, Isaksson et al. 2015).

157 For this study, fresh laid eggs of entire clutches were collected in April and May 2015 from a  
158 nest box population of great tits in the Dellinger Buchet, a mosaic of deciduous and coniferous forest  
159 in Southern Germany (Bavaria; 48°03' N, 11°13' E, 620 m above sea level). The breeding stage was  
160 monitored every second day from the first signs of nest construction onwards. Eggs were collected on  
161 the date of lay between 8:00 and 13:00h and each removed egg was replaced with a dummy egg. In  
162 total, 93 eggs from 11 first clutches were collected. Clutch sizes ranged from 6 to 10 eggs (mean  $\pm$  SD:  
163  $8.45 \pm 1.13$  eggs). Once in the laboratory, egg measurements were taken following established  
164 protocols by Lessells et al. (2002). Briefly, eggs were weighed, opened, and the yolk separated from  
165 the remainder of the egg. Excess albumen was removed from the yolk by rolling it on a piece of paper.  
166 During this step the vitelline membrane of the yolk got disrupted in three out of 93 eggs, but since the  
167 amount of yolk lost was minor, we included these eggs in the analysis. The yolk was weighed,  
168 homogenized in distilled water and immediately stored at  $-80^{\circ}\text{C}$  until further analysis. The egg shell  
169 was washed, weighed and dried at room temperature until the next morning when the dry shell was  
170 weighed again. Albumen mass was estimated by subtracting the wet yolk mass and the dry shell mass  
171 from the total egg weight.

172 We measured local environmental conditions during the formation of the eggs. Ambient  
173 temperature was recorded every hour via i-buttons (DS9093A+ Thermochron iButton) placed in 12

174 different places across the study site. For our analyses, we used the mean temperature on the three  
175 days preceding the lay date of each egg, hereafter referred as mean temperature, since the phase of  
176 follicular growth lasts about three days in great tits (Walsberg 1983). Preliminary exploration of our  
177 data showed that other environmental factors like rainfall did not have an effect on the allocation of  
178 yolk components (results not shown). Hence, we only included mean ambient temperature in our  
179 analyses.

180         Nine of the 11 females were captured when incubating the replaced eggs, on average  $4.78 \pm$   
181  $1.62$  days after they had laid their last egg. Females were marked with a numbered aluminum ring and  
182 plastic split rings with a unique colour combination for individual identification. All females were  
183 adults ( $> 1$  year), as determined from plumage characteristics. Body mass (to the nearest 0.1 g), tarsus  
184 length (to the nearest 0.1 mm) and wing length (to the nearest 0.1 mm) were measured for each  
185 captured individual. Scaled body mass index was used as an indicator of female condition, since it  
186 accounts for the allometric relationship between different measures of body size and mass (Peig and  
187 Green 2009). As recommended by Peig and Green (2009), parameters with the highest correlation in  
188 our population were used to estimate female condition: body mass and wing length ( $r = 0.68$ ; p-value  
189  $= 0.05$ ).

190

### 191         **Steroid hormone analysis**

192 To quantify androstenedione,  $5\alpha$ -dihydrotestosterone, testosterone, and corticosterone concentrations,  
193 we conducted radioimmunoassays following the method described by Wingfield and Farner (1976),  
194 modified by Goymann et al. (2008) with additional adjustments for the measurement of egg yolk  
195 following Schwabl (1993). Steroids were extracted from the yolk in two sets of assays. Because one of  
196 the key aspects of our manuscript was to study yolk allocation of individual females, and variation in  
197 yolk allocation among females is typically higher than within females (reviewed by Groothuis et al.  
198 2005), eggs from the same clutch were always included in the same assay. On average, 50  $\mu$ l of the  
199 yolk/water emulsion was transferred to 16 x 100 glass test tubes. Along with the samples, two blanks  
200 containing 300  $\mu$ l distilled water and three positive controls containing 100  $\mu$ l stripped chicken plasma  
201 pools were also prepared. Distilled water was added to all tubes to have the same final volume (300  
202  $\mu$ l). Next, we added 10  $\mu$ l tritiated steroid (1500 dpm; PerkinElmer, MA, USA) of all steroid  
203 hormones to be measured to all tubes except the blanks to estimate extraction efficiency. We then  
204 added 4 ml of diethyl ether to each sample. After overnight equilibration the samples were centrifuged,  
205 the supernatant was collected and dried under a nitrogen stream in a water bath at 40 °C. Each sample  
206 was then subjected to a second extraction by adding 2 ml dichloromethane. The dried supernatant was  
207 re-suspended in 1 ml 99% ethanol. After an overnight reconstitution, extracts were centrifuged, the  
208 supernatant collected and again dried under a nitrogen stream in a water bath at 40 °C, and  
209 reconstituted in isoctane with 2% ethyl acetate. Steroids were then further separated via  
210 diatomaceous earth column chromatography. Fractions containing different steroids were eluted by

211 mixing ethyl acetate (EtAc) with isooctane at increasing concentrations (2%, 10%, 25%, and 45%  
212 EtAc for androstenedione, 5 $\alpha$ -dihydrotestosterone, testosterone and corticosterone, respectively). Each  
213 eluted fraction was collected in 12  $\times$  75 mm glass tubes and evaporated under a nitrogen stream.  
214 Androgens (androstenedione, 5 $\alpha$ -dihydrotestosterone, and testosterone) were re-dissolved in 300  $\mu$ l  
215 phosphate-buffered saline. 80  $\mu$ l of the resuspended fraction were used to estimate individual  
216 extraction recoveries. Recoveries for the two sets of columns (n = 50 samples per set) were within the  
217 expected range previously reported for great tits (Tschirren et al. 2004, Groothuis et al. 2008, Lessels  
218 et al. 2016) and mean  $\pm$  SD were as follows: androstenedione = 83  $\pm$  2.83%, 5 $\alpha$ -dihydrotestosterone =  
219 55% (in both sets), testosterone = 51  $\pm$  1.41%. Duplicates of 100  $\mu$ l were used for the  
220 radioimmunoassays. The hormone concentration of each sample was corrected for the individual  
221 extraction efficiency. Some of the samples had concentrations above the upper detection limit of the  
222 assay (which was at 200 pg per tube), hence we extracted another proportion of the yolk following the  
223 same protocol but using a smaller volume (70  $\mu$ l) of the extracted sample for the radioimmunoassays  
224 (androstenedione: 79 samples; testosterone: 6 samples). Recoveries for these two additional sets of  
225 columns were comparable to the first set of assays (mean  $\pm$  SD only for androstenedione):  
226 androstenedione = 78.5  $\pm$  0.71%, testosterone = 89%. Polyclonal antibodies used were the following:  
227 AN6-22 for androstenedione, DT3-351 for 5 $\alpha$ -dihydrotestosterone and T3-125 for testosterone (all  
228 Esoterix Endocrinology, Inc., CA, USA). The lower detection limit was 0.80 pg/ml for  
229 androstenedione, 0.56 pg/ml for 5 $\alpha$ -dihydrotestosterone, and 0.36 pg/ml for testosterone. Blanks were  
230 all below detection limits. All samples were analyzed in two assays. The intra-assay variations for  
231 both assays, determined from the three positive controls, were: androstenedione = 7.65  $\pm$  0.85%, 5 $\alpha$ -  
232 dihydrotestosterone = 4.15  $\pm$  0.25%, testosterone = 9.3  $\pm$  0.5%. The inter-assay variations, determined  
233 by including the first positive control per assay, were (mean  $\pm$  SD): androstenedione = 16.2%, 5 $\alpha$ -  
234 dihydrotestosterone = 3.4%, and testosterone = 12.4%. For those samples that needed to be re-  
235 extracted the intra-assay variations were: androstenedione (mean  $\pm$  SD) = 8.65  $\pm$  1.13%, testosterone =  
236 4.1%.

237 Corticosterone concentrations were determined by enzyme immunoassay (Lot No: 12041402D  
238 and 08241511, Enzo Life Sciences GmbH, Germany). After column chromatography, the  
239 corticosterone fractions of the samples were dried and then dissolved in 350  $\mu$ l assay buffer. An  
240 aliquot of 80  $\mu$ l was used to estimate individual extraction recoveries (mean  $\pm$  SD recoveries were 57  
241  $\pm$  11.31 %). Duplicates of 100  $\mu$ l were added to individual wells and samples were distributed across 4  
242 assays. The intra-assay coefficients of variation were 1.9%, 5.5%, 2.4%, 2.3% (calculated from two  
243 replicate standards per plate) and the inter-assay variation was 3%. The corticosterone antibody has a  
244 0.5% cross-reactivity with progesterone, but the column chromatographic separation of steroid  
245 hormones had separated corticosterone from progesterone (Wingfield and Farner 1976), so that cross-  
246 reactivity can be excluded.

247

248 **Antioxidant extraction and HPLC analysis**

249 Vitamin E ( $\alpha$ -tocopherol) and carotenoids (lutein and zeaxanthin) were extracted simultaneously.  
250 Briefly, to 20 mg yolk, 200  $\mu$ l acetone with internal standard - 600  $\mu$ M retinyl acetate and 1 mM  
251 tocopheryl acetate (Sigma-Aldrich, Stockholm, Sweden) was added, followed by vortexing. The  
252 samples were then left overnight at  $-80^{\circ}\text{C}$ . The following day, 200  $\mu$ l tert-butyl methyl ether was  
253 added, followed by vortexing. Samples were centrifuged at  $10^{\circ}\text{C}$  for 5 min (13,000 rpm), and the  
254 supernatant was transferred to a new tube and dried under nitrogen gas. The samples were washed  
255 twice with 200  $\mu$ l acetone, followed by vortexing and centrifugation; the supernatant was removed to a  
256 new tube between the washes. Again, samples were dried under nitrogen gas. The residue was  
257 dissolved in 100  $\mu$ l methanol-acetonitrile (30:70). The amount of  $\alpha$ -tocopherol, lutein and zeaxanthin  
258 were determined by high performance liquid chromatography (HPLC) with the following  
259 specifications: column Phenomenex Syndergi 4u Hydro-RP 80A,  $250 \times 3$  mm +  $4 \times 2$  mm guard  
260 column, isocratic 20 % MeOH, 80 % AcCN, 12 min, 1,2 ml/min, oven  $40^{\circ}\text{C}$ , injection 5  $\mu$ l, UV 450  
261 nm, FL ex: 290 nm, em: 325 nm. The concentrations were calculated from standard curves made from  
262 lutein, zeaxanthin and tocopherol, along with corrections for their respective internal standards.

263

264 **Fatty acid extraction and quantification**

265 The fatty acids were extracted as described by Eikenaar et al. (2017). Briefly, a total lipid extraction of  
266 approximately 5 mg of yolk was done using chloroform and methanol (2:1 v/v). Base methanolysis  
267 was carried out to transform the fatty acids into corresponding fatty acid methyl esters (FAMES). The  
268 FAMES were extracted using heptane ( $>99\%$ ; VWR Prolabo), and the extracts were analyzed using an  
269 Agilent 5975 mass spectrometer coupled to an Agilent 6890 gas chromatograph with an HP-  
270 INNOWax PEG column (30 m, 0.25 mm i.d., 0.25 mm film thickness; Agilent). Analyses and  
271 quantification of chromatograms were performed using ChemStation software (Agilent). FAMES were  
272 identified by comparing mass spectra and retention times with those of synthetic standards (Supelco  
273 37-Component FAME Mix, Sigma-Aldrich).

274

275 **Data handling and statistical analysis**

276 In total, we studied 11 yolk components. For yolk steroid hormones and antioxidants, the statistical  
277 analyses were done using the concentration (in pg/ml or standard micromolar, respectively), while for  
278 fatty acids we analyzed the proportion of each fatty acid group (Andersson et al. 2015, Isaksson et al.  
279 2017). For simplicity, lutein and zeaxanthin were pooled and referred to as total carotenoids whenever  
280 both components showed similar results. Fatty acid proportions were calculated by dividing the peak  
281 area of each fatty acid by the sum of the peak areas of all fatty acids in each individual sample  
282 (Andersson et al. 2015, Isaksson et al. 2017). The proportions of all individual fatty acids within a  
283 certain chemical class of fatty acid were then combined to obtain relative levels of total saturated fatty  
284 acids, total monounsaturated fatty acids, total  $\omega$ -3 PUFA, and total  $\omega$ -6 PUFA (Andersson et al. 2015,



285 Isaksson et al. 2017). Furthermore, one of our aims was to study the difference in yolk components  
286 along the laying sequence. Since great tits vary in clutch size, analyzing yolk components in terms of  
287 only egg number is inadequate. We therefore used the relative egg position (determined as egg  
288 position/N eggs per clutch) within a range from 0 to 1 as a standardized variable in our analysis  
289 (indicated as ‘first’, ‘middle’ and ‘last’ in the figures for illustrative purposes only).

290 We ran three univariate mixed-models fitting each yolk component or group of yolk  
291 component, respectively, as a response variable. All continuous explanatory variables were mean-  
292 centered and their variance standardized to facilitate comparison of variance components across traits.  
293 First, to study the relationship between yolk components and female body condition we used the  
294 scaled body mass index as a measure of female condition, egg position, and mean ambient temperature  
295 (temperature range = 7.6 – 16.8°C) as covariates. Lay date was not included in this analysis to avoid  
296 overparametrization. Despite the fact that we were interested in the effect that female body condition  
297 has on yolk components (i.e., fixed factor), female identity and the interaction between female identity  
298 and laying sequence were fitted in the model as random elevation and random slope, respectively (for  
299 a further discussion of the rationale of this approach see Schielzeth and Forstmeier, 2009).

300 Second, to study female allocation at the population and individual level, we used a random  
301 regression model (i.e., a reaction norm framework; Nussey et al. 2007, Dingemanse et al. 2010). Egg  
302 position, lay date (date of first egg, range = 16<sup>th</sup> of April – 9<sup>th</sup> of May) and mean ambient temperature  
303 were fitted as covariates (the correlation between laying date and mean ambient temperature was  
304 relatively low;  $r = 0.26$ ;  $p$ -value = 0.01). Female identity (i.e., random elevation) and the interaction  
305 between female identity with respect to laying (i.e., random slope) were also fitted in the model. By  
306 using this random elevation-slope approach we were able to estimate three parameters: i) the among-  
307 female variation in the average concentration/proportion of egg components (i.e., variance in  
308 elevation; Figure 1b), ii) the among-female variation in plasticity along the laying sequence (i.e.,  
309 variance in slope; Figure 1c), and iii) the correlation between elevation and slope (Figure 1d).

310 Finally, to calculate the repeatability ( $R$ ) of yolk components among females, we built a model  
311 similar to the one described in the previous paragraph, but only including female identity as a random  
312 intercept. The repeatability of female yolk allocation was calculated as the variance component  
313 explained by female identity divided by the total variance (female identity + residual) in the presence  
314 of fixed effects (“adjusted repeatability”; Nakagawa and Schielzeth 2010; i.e., egg position, lay date  
315 and mean ambient temperature).

316 All statistical analyses were performed in R statistical freeware R-3.3.3 (R Core Team 2017)  
317 using the “lme4” and “arm” packages in a Bayesian framework with non-informative priors. We  
318 assumed a Gaussian error distribution, which was confirmed for all response variables after visual  
319 inspection of model residuals. When necessary, response variables were transformed (details on  
320 transformations are provided in the Tables). We subsequently used the *sim* function to simulate values  
321 from the posterior distributions of model parameters. We extracted the 95% Bayesian Credible

322 Interval (CrI) around the mean (Gelman and Hill 2007), and assessed statistical support by obtaining  
323 the posterior distribution of each parameter. CrI provide more valuable information than p-values, like  
324 for example, the uncertainty around the estimates. We use the term “meaningful effect” if zero was not  
325 included within the 95% CrI (Korner-Nievergelt et al. 2015). For intervals overlapping zero only  
326 slightly, we report the posterior probability of the estimate being positive or negative (see Korner-  
327 Nievergelt et al. 2015 for further discussion of how to infer conclusions from Bayesian statistical  
328 analysis).

329

330

## 331 **Results**

332

### 333 **Egg yolk components, environmental effects and female body condition**

334 Egg mass increased along the laying sequence by 12%, while yolk mass only tended to increase  
335 (Supplementary material Appendix 1, Table A1). The concentrations of androstenedione, 5 $\alpha$ -  
336 dihydrotestosterone and testosterone were substantially higher than those of corticosterone  
337 (Supplementary material Appendix 1, Table A2). Among the antioxidants, the carotenoid lutein was  
338 the most abundant, followed by zeaxanthin and vitamin E. Furthermore, 20 fatty acids were identified  
339 (Supplementary material Appendix 1, Table A3), with the monounsaturated fatty acid group  
340 contributing most to the total fatty acid content (around 46%; Supplementary material Appendix 1,  
341 Table A2), followed by saturated fatty acids,  $\omega$ -6 PUFAs and lastly  $\omega$ -3 PUFAs.

342 Females that laid eggs later in the breeding season allocated higher concentrations of  
343 androstenedione and higher proportions of saturated fatty acids and  $\omega$ -3 PUFAs into the yolk, while  
344 the concentration of corticosterone and the proportion of  $\omega$ -6 PUFAs decreased over the breeding  
345 season (Table 1). The mean ambient temperature had a positive effect on the proportion of  $\omega$ -6  
346 PUFAs, and a negative one on the concentrations of corticosterone and the proportion of  
347 monounsaturated fatty acids (Table 1). Neither lay date nor mean ambient temperature influenced the  
348 concentrations of yolk antioxidants. Female scaled body mass index had a negative effect on 5 $\alpha$ -  
349 dihydrotestosterone concentrations and a positive one on vitamin E concentrations in the yolk  
350 (Supplementary material Appendix 1, Table A4). However, scaled body mass index had a weak effect,  
351 if any, on most of the other yolk components.

352

### 353 **Mean phenotypic plasticity in yolk components along the laying sequence: population** 354 **level**

355 5 $\alpha$ -dihydrotestosterone, all three antioxidants (vitamin E and both carotenoids), the proportion of  $\omega$ -6  
356 PUFA and the ratio of total  $\omega$ -6/ total  $\omega$ -3 PUFA decreased over the laying sequence (Table 1; Figure  
357 2). The other steroid hormones (androstenedione, testosterone, and corticosterone) and the proportion  
358 of  $\omega$ -3 PUFA did not change, while the proportion of saturated fatty acids increased from the first to

359 the last egg. There was moderate support for the proportion of monounsaturated fatty acids to increase  
360 over the laying sequence (posterior probability = 0.97).

361

### 362 **Variation in yolk components along the laying sequence: female level**

363 Females not only differed in mean concentrations/proportions of yolk components allocated, but also  
364 in their phenotypic plasticity over the laying sequence (variation in elevation and slope, respectively;  
365 Table 1, Figure 3). Furthermore, the mean trait value and the slope were negatively correlated (i.e.,  
366 showed a “fanning-in” pattern) in five of the 11 components measured: androstenedione, testosterone,  
367 both carotenoids (i.e., lutein and zeaxanthin) and monounsaturated fatty acids (Figure 3, Table 1).  
368 Females that on average allocated low levels of androstenedione, testosterone and monounsaturated  
369 fatty acids were more plastic, i.e., increased the concentrations/proportions of these yolk components  
370 along the laying sequence more strongly than did females with high average  
371 concentrations/proportions. In contrast, the decrease in carotenoid concentrations along the laying  
372 sequence was more pronounced in females that allocated higher average concentrations of carotenoids  
373 into their yolks. For vitamin E, the correlation between elevation and slope was positive (Table 1), but  
374 this correlation was driven by one female (Figure 3c; uppermost line) and therefore this result should  
375 be treated with caution. The elevation and slope of allocation for the rest of the components were only  
376 weakly correlated (Table 1).

377 For the vast majority of the yolk components (10 of 11), female adjusted repeatabilities were  
378 higher than 0.30 (Figure 4). The fatty acid groups had the highest repeatability values ( $\omega$ -3 PUFA:  $R =$   
379 0.90;  $\omega$ -6 PUFAs:  $R = 0.92$ ), followed by the antioxidants, which all had values of repeatability  
380 approaching  $R \sim 0.40$ . Steroid hormones showed the widest range of repeatabilities, with  $5\alpha$ -  
381 dihydrotestosterone exhibiting a high ( $R = 0.64$ ), testosterone and androstenedione a moderate ( $R =$   
382 0.43 and  $R = 0.33$  respectively), and corticosterone a relatively low repeatability ( $R = 0.18$ ).

383

384

## 385 **Discussion**

386

387 We quantified 11 yolk components and analyzed their variation along the laying sequence by  
388 acknowledging the multi-level nature of female resource allocation. At a population level, the  
389 concentrations/proportions of five resources in the yolk varied along the laying sequence: first-laid  
390 eggs generally contained higher concentrations of  $5\alpha$ -dihydrotestosterone, antioxidants and  
391 proportions of  $\omega$ -6 PUFA, and lower proportions of saturated fatty acids than last-laid eggs (Table 1;  
392 Figure 2). This result implies that in general the physiological environment is rather different for  
393 offspring developing in first *versus* last eggs. Individual females allocated yolk components over the  
394 course of laying in a pattern that was not necessarily the same as observed at the population level  
395 (Table 1; Figure 3). Females differed in their mean allocation of components (i.e., differences in the

396 elevation of reaction norms) indicating that some females allocated on average higher amounts of  
397 components into their eggs than other females, while they also varied in their plastic response over the  
398 laying sequence (i.e., differences in the slope of reaction norms; Table 1; Figure 3). In addition, for  
399 some yolk components these two parameters were correlated. Finally, egg component allocation was  
400 repeatable, i.e., the concentration/proportion of most yolk components was more similar among eggs  
401 from the same female than among eggs from different females (Figure 4). Overall, these results show  
402 that at both population- and female-level, the physiological environment of the offspring will be  
403 different depending on the egg from which they develop. However, even if females are plastic in their  
404 allocation of components along the laying sequence, those eggs laid by the same mother are more  
405 similar to each other as compared to the eggs laid by a different mother.

406

#### 407 **Mean phenotypic plasticity in yolk components along the laying sequence: population** 408 **level**

409 For yolk hormones, consistent species-specific patterns of allocation along the laying sequence have  
410 been described for avian eggs (reviewed by Groothuis et al. 2005, Gil 2008). However, opposing  
411 patterns for the same hormone have also been described for different populations of the same species  
412 (reviewed by Groothuis et al. 2005, Gil 2008). For example, in free-living great tits an increase in  
413 androstenedione concentrations from first to last egg has been reported (Tschirren et al., 2004; Lessells  
414 et al., 2016), whereas in a study on great tits from selection lines the mean phenotypic plasticity  
415 showed opposing patterns depending on behavioral traits (Groothuis et al. 2008), and in our study  
416 androstenedione did not change. Further, a decrease in 5 $\alpha$ -dihydrotestosterone along the laying  
417 sequence was reported by Lessells et al. (2016) and our study, but not in the other two above-  
418 mentioned studies. Testosterone concentrations increased over the laying sequence in Tschirren et al.  
419 (2004) and Groothuis et al. (2008; only females from the ‘bold’ line), but no such trend was observed  
420 by Lessells et al. (2016) and the current study. Finally, while in a previous study yolk corticosterone  
421 increased (Lessells et al. 2016), we found no change along the laying sequence. This lack of agreement  
422 among different great tit populations could be explained, on the one hand, by female quality (e.g.,  
423 body condition; Supplementary materials Appendix 1, Table A4), environmental conditions (e.g.,  
424 mean ambient temperature; Table 1), consistent individual differences between females (“personality”;  
425 Ruuskanen et al. 2018), and social factors, such as territory quality and male condition or personality  
426 (Remeš 2011, Ruuskanen et al. 2018), which all may influence female yolk allocation. In addition,  
427 opposing population trends could also be explained by different patterns of individual female plasticity  
428 (see below).

429 In the current study, all three antioxidants (i.e., vitamin E, lutein, and zeaxanthin) decreased  
430 along the laying sequence, confirming previous studies showing that last-laid eggs generally have  
431 lower concentrations of antioxidants in birds (Royle et al. 1999, 2003, H $\ddot{o}$ rak et al. 2002, Blount et al.  
432 2002, Rubolini et al. 2011; but see T $\ddot{o}$ r $\ddot{o}$ k et al. 2007). Animals cannot synthesize vitamin E and

433 carotenoids *de novo*, therefore these antioxidants have to be obtained from the diet (Surai and Speake  
434 2008) and can then be allocated into the egg yolk (from where the developing embryo will absorb  
435 them; reviewed by Yigit et al. 2014). These antioxidants may represent a limiting resource for the  
436 mother (Møller et al. 2000), and indeed, females in better body condition on average allocated higher  
437 concentrations of vitamin E into their eggs (Supplementary materials Appendix 1, Table A4).  
438 However, lesser black-backed gull (*Larus fuscus*) females supplemented with a diet rich in carotenoids  
439 had higher carotenoid concentrations in plasma and yolk, but they also decreased yolk carotenoid  
440 concentrations over the laying sequence in a similar way as non-supplemented birds (Blount et al.  
441 2002). Since the last-laid eggs in our study were not inferior to first-laid eggs in terms of egg mass  
442 (which increased over the laying sequence; Supplementary materials Appendix 1, Table A1), these  
443 findings suggest that the observed decline in antioxidants cannot be attributed solely to female  
444 depletion in nutrients and other resources over the laying period.

445 Eggs were collected at a time when great tits were changing their diet from mainly feeding on  
446 seeds to predominantly feeding on invertebrates (caterpillars) which, compared to seeds, are  
447 particularly rich in saturated fatty acids, the  $\omega$ -3 PUFA  $\alpha$ -linolenic acid, and carotenoids (Isaksson and  
448 Andersson 2007, Andersson et al. 2015, Isaksson et al. 2015). In addition, a strong correlation between  
449 fatty acid levels of ingested food and fatty acids in yolk has previously been established (Lin et al.  
450 1991, Hulbert and Abbott 2011, Twining et al. 2016). Thus, the changes in fatty acid composition  
451 along the laying sequence reported here (i.e., an increase and decrease in the proportion of saturated  
452 fatty acids and  $\omega$ -6 PUFA, respectively) may be explained by an increase in caterpillar availability  
453 over the course of the breeding season, and a lower reliance on seeds, which are richer in  $\omega$ -6 PUFAs.  
454 In line with this idea, lay date had a statistically positive effect on saturated fatty acids and  $\omega$ -3 PUFA  
455 proportions (Table 1). However, other factors may also contribute to the observed patterns given that  
456 the laying period in great tits can be quite short (mean  $\pm$  SD: 8.45  $\pm$  1.13 days in this study). For  
457 instance, in contrast to PUFAs, saturated and monounsaturated fatty acids can be biosynthesized *de*  
458 *novo* by animals, and fatty acids can also be selectively mobilized from internal stores to plasma  
459 (Raclot 2003, Price et al. 2008), suggesting that female condition at the start of laying may also play a  
460 role for the fatty acid allocation. Lastly, to date only three studies have documented mean phenotypic  
461 plasticity in fatty acid proportions along the laying sequence in free-living birds (Bourgault et al. 2007;  
462 Toledo et al. 2016). In contrast to our findings, a recent study on several populations of great tits in the  
463 UK found no variation in fatty acid composition along the laying sequence (Toledo et al. 2016). In that  
464 study, however, fatty acid composition was analyzed only for the 2<sup>nd</sup> to the 5<sup>th</sup> eggs in the laying  
465 sequence, which is equivalent to analyzing yolks only from the first to the middle eggs in our study.  
466 After re-analyzing our data with only first to middle eggs (n = 49 eggs), the fatty acid proportion still  
467 changed along the laying sequence (results not shown), thus indicating that it is unlikely that the  
468 difference in the position of the eggs analyzed explains the differences in the patterns of allocation  
469 obtained in the two studies. On the other hand, Toledo et al. (2016) collected one egg per nest. Our

470 finding that yolk fatty acid composition in general is more similar in eggs from the same mother  
471 compared to those from other mothers (i.e., high repeatability; see below) could explain the  
472 differences in allocation patterns reported in these two studies.

473 Finally, it is important to bear in mind that ethical considerations limited our sample size (i.e.,  
474 of entire clutches collected), potentially reducing our statistical power to identify the environmental or  
475 internal factors underlying population-level variation in yolk steroid hormones, antioxidants and fatty  
476 acids allocation.

477

#### 478 **Co-secretion of yolk components**

479 To date, most studies investigating the fitness consequences of yolk allocation patterns focused on  
480 single groups of yolk components. This approach has been important for understanding the ways in  
481 which females can generate transgenerational phenotypic plasticity in the offspring by allocating  
482 certain substances into their eggs, as well as the evolutionary consequences. However, such studies  
483 may misinterpret the fitness benefits of single yolk components because we now know that different  
484 classes of components are allocated at the same time, often targeting the same phenotypic traits in the  
485 offspring (e.g., Treidel et al. 2013). We simultaneously quantified yolk steroid hormones, antioxidants  
486 and fatty acids, components that are known to affect growth, immune responses and oxidative stress of  
487 offspring, but sometimes in opposite directions. Although our study cannot directly address patterns of  
488 co-secretion of certain components because of limitations in sample size (n=11 clutches), we have  
489 observed some tantalizing patterns of co-occurrence in our study population that merit further  
490 investigation. For instance, first-laid eggs were high in 5 $\alpha$ -dihydrotestosterone concentrations and  $\omega$ -6  
491 PUFA proportions. Both of these components are essential to promote embryo development, but they  
492 can also potentially increase the concentration of reactive oxygen species and thereby induce oxidative  
493 stress (Pamplona et al. 2002, Larsson et al. 2004, Alonso-Alvarez et al. 2007, Hulbert and Abbott  
494 2011). However, first-laid eggs also had high antioxidant concentrations, which can buffer oxidative  
495 stress (e.g., Royle et al. 2001, Surai et al. 2001, Watson et al. 2018). These findings raise the question  
496 of whether selection promotes females to allocate eggs with a particular yolk composition, for  
497 example by co-secreting substances that have growth-enhancing but oxidative-stress inducing effects  
498 (like androgens and PUFAs) together with substances that can mitigate oxidative damage like  
499 antioxidants. Supporting this idea, a positive correlation between testosterone and vitamin E  
500 concentrations in the yolk of 75 bird species was recently reported (Giraudeau and Ducatez 2016).  
501 Detailed studies of the co-secretion of several yolk components are now required to address the  
502 question of whether natural selection operates on female allocation patterns to balance the costs and  
503 benefits of allocating substances to the offspring. Furthermore, in addition to quantifying the fitness  
504 costs and benefits incurred by females during the egg-laying stage (i.e., through resource acquisition,  
505 synthesis, allocation, etc.), future studies should also determine the costs and benefits that arise later at  
506 the offspring stage – to the mother (e.g., by having to provision more demanding offspring), to the

507 offspring (e.g., by having a suboptimal phenotype given the environmental and social circumstances),  
508 and to the female's partner (e.g., by having to increase investment into parental care).

509

### 510 **Variation in yolk components along the laying sequence: female level**

511 Our findings provide the first evidence that females consistently differ in average amounts of yolk  
512 components *and* in their plasticity of allocation along the laying sequence (i.e., in their slope). This  
513 result could explain the existence of divergent mean phenotypic plasticity (i.e., at a population level)  
514 found in studies on different populations of the same species (reviewed by Groothuis et al. 2005, Gil  
515 2008). Our current understanding of the mechanisms behind female variation in allocation patterns is  
516 limited. Female mean yolk androgen deposition shows moderate heritability (e.g., great tits,  
517 Ruuskanen et al. 2016). However, whether mean deposition of antioxidants and fatty acids is also  
518 partially explained by heritable variation still remains unknown. Furthermore, which genetic factors  
519 may underlie female phenotypic plasticity also represents an important unanswered question.  
520 Ecological parameters that affect female physiological condition like prevailing climatic conditions,  
521 female quality or population density could also potentially alter female yolk allocation along the  
522 laying sequence. Genetic and non-genetic sources can simultaneously affect both components of the  
523 reaction norm (i.e., the variation in the average amount of yolk components and female plasticity),  
524 thus contributing to the overall among-female variation observed.

525 The elevation-slope coefficients that we obtained in our analyses for yolk components like  
526 androstenedione, testosterone, carotenoids, vitamin E and MUFAs should be interpreted with caution  
527 because of the low sample sizes (Martin et al. 2011, van de Pol 2012). Nevertheless, our analyses  
528 allowed us to quantify the covariation between two sources of variation, i.e. the extent and the  
529 direction to which the elevation and slope in the allocation of one yolk component were correlated in  
530 females (Table 1; Figure 3). For example, a negative correlation between elevation and slope indicates  
531 that females that overall allocated a higher concentration of a component also decreased this  
532 component's concentration more strongly along the laying sequence (i.e., were more plastic). Such a  
533 pattern could suggest that females experienced a constraint along the laying sequence. Furthermore,  
534 the presence of correlations between elevation and slope in yolk components indicates that  
535 consequences of such maternal effects cannot be fully evaluated by studying these two sources of  
536 variation independently. For those components where female mean allocation and individual plasticity  
537 are correlated, fitness consequences (e.g., number of chicks that hatched or fledged) that would be  
538 attributed to one source of variation, for example to mean yolk concentrations in testosterone through  
539 an analysis of only the elevation of the allocation reaction norm, might in fact be caused by the other  
540 component, i.e., the change in yolk testosterone concentrations along the laying sequence. Lastly, this  
541 finding also raises the question of whether females with different reaction norms experience divergent  
542 fitness consequences. In other words, do females that on average deposit a higher proportion of e.g.,  
543 monounsaturated fatty acids but are less plastic along the laying sequence have higher reproductive

544 success than females that deposit on average lower proportions of that components but are more  
545 plastic (Figure 3e)?

546 Female-level variation in yolk allocation as well as the basis behind such plasticity still is a  
547 largely unexplored field of research. Does selection shape the allocation of average levels of egg  
548 components, the degree of plasticity over the laying sequence, or the correlation between these two  
549 traits? Addressing these questions will require large sample sizes, which might be a limiting factor in  
550 this field of research for ethical reasons. However, combining data from different populations and  
551 research groups could be a rewarding avenue to overcome this obstacle and increase our knowledge of  
552 the evolutionary and ecological forces driving phenotypic female variation in yolk allocation.

553

### 554 **Repeatability in yolk allocation**

555 The repeatability estimates in the present study varied depending on type of yolk resources allocated  
556 (Figure 4). Ours is the first study to report (adjusted) repeatabilities for antioxidants and fatty acids in  
557 egg yolks. The medium-high repeatabilities observed for these two groups (ranging from 0.36 to 0.92,  
558 Figure 4) are perhaps not surprising since great tits usually lay one egg each day, and may have  
559 experienced homogeneous environmental conditions within this short time frame. In contrast, the  
560 lower repeatability reported here for yolk hormones might be due to the fact that steroid hormones are  
561 synthesized by the mother herself (Groothuis and Schwabl 2008, Gil 2008). Within the group of  
562 steroid hormones measured, corticosterone concentrations had the lowest repeatability estimates.  
563 Plasma corticosterone levels are known to fluctuate over short time scales, and its concentration in  
564 yolk may be influenced by maternal circulating concentrations (Saino et al. 2005, Groothuis and  
565 Schwabl 2008, Pitk et al. 2012). Therefore, the low repeatability estimates obtained for corticosterone  
566 might result from variations in maternal plasma concentrations along the laying sequence.  
567 Interestingly, while in our study 5 $\alpha$ -dihydrotestosterone was the steroid hormone with the highest  
568 repeatability estimate ( $R = 0.64$ ), in another recent study on great tits this hormone showed the lowest  
569 repeatability value ( $R = 0.29$ ; Lessells et al. 2016). However, care should be exercised when  
570 comparing different studies because repeatability is a coefficient between variance explained by  
571 female identity in relation to the total variance (Nakagawa and Schielzeth 2010). Differences among  
572 females in their ability to synthesize and/or allocate each yolk component, the methodology used to  
573 measure each component, or environmental conditions that might increase the residual (unmeasured)  
574 variance, can all modify repeatability estimates even when the among-female variance remains the  
575 same. We therefore propose that future studies should report both among-female variance and  
576 repeatability estimates to allow for a better comparison of female consistency in yolk allocation across  
577 populations.

578 Repeatability estimates are a useful tool for evolutionary ecologists because they enable the  
579 quantification of the upper limit to heritability (Boake 1989). These estimates therefore provide  
580 information about the potential genetic contribution to the measured phenotype as well as clues as to



581 whether some traits might evolve in response to selection. In our study, repeatability estimates for  
582 antioxidants and fatty acids were high. However, this does not necessarily indicate a high heritability  
583 in the allocation of these components. High repeatability estimates in our study could also be  
584 explained by repeated measurements taken at very short intervals (Araya-Ajoy et al. 2015, Holtmann  
585 et al. 2017) and/or by the fact that we adjusted for environmental factors such as lay date and mean  
586 ambient temperature. Irrespective of differences in absolute estimates of repeatability, the finding that  
587 repeatabilities for almost all yolk components were moderate to high ( $R \geq 0.30$ , with the exception of  
588 corticosterone, Figure 4) indicates that the developmental environment for offspring of the same  
589 mother is largely similar. Importantly, the high repeatability estimates obtained also confirm that the  
590 method of analyzing a single egg (ideally the middle egg) from a nest is a suitable way to estimate  
591 clutch-level yolk composition in studies of wild populations (e.g., Giordano et al. 2014), a technique  
592 that allows to assess the consequences for offspring phenotypes and fitness.

593

594

## 595 **Conclusions**

596

597 The present study emphasizes the need to account for female variation in yolk allocation along the  
598 laying sequence at multiple levels as a way to increase our understanding on the evolutionary  
599 processes that shape female yolk allocation. At a population level, our study shows that the  
600 developmental environment provided by mothers is different for offspring developing in first *versus*  
601 last eggs for almost half of the 11 components measured. Although not analyzed quantitatively, our  
602 study raises the question whether the patterns of allocation observed for steroid hormones,  
603 antioxidants and fatty acids are the result of selection favouring a complementary allocation of yolk  
604 components. Interestingly, the patterns of allocation at an individual level differed from the general  
605 pattern observed at a population level. At a female level, individuals varied among each other in the  
606 average allocation of yolk components, in their plasticity along the laying sequence as well as in the  
607 correlation between both parameters. In addition, females were remarkably consistent in the allocation  
608 of the majority of yolk components, confirming that the method of collecting a single egg from a nest  
609 is a suitable way to estimate clutch-level yolk composition in studies of wild populations – at least in  
610 those that aim to quantify the consequences for offspring phenotypes. Future studies can now build on  
611 these findings and test these patterns and their consequences in other species. It would also be  
612 important to analyze whether individual females are consistent in their allocation of yolk components  
613 across clutches laid in the same or in different years and if female plasticity along the laying sequence  
614 varies across homogeneous *vs.* heterogeneous environments. Since female allocation may be key to  
615 understand patterns at a population level, using mixed models to study female allocation at multiple  
616 levels opens up promising fields of research.

617

618  
619  
620  
621  
622  
623  
624  
625  
626  
627  
628  
629  
630  
631  
632  
633  
634  
635  
636  
637  
638  
639  
640  
641  
642  
643  
644  
645  
646  
647  
648  
649  
650  
651  
652  
653  
654

## **Declarations**

### **Acknowledgements**

We are grateful to Sabine Jörg and Nicolás Adreani for their invaluable help in the field, Anna Johansson and Hong-Lei Wang for important contributions to fatty acid extraction and analysis, and Amparo Herrera-Dueñas and Jürgen Kuhn for antioxidant extractions and quantification. We also thank Fränzi Korner and María Moirón for their help and insightful discussions regarding the statistical analysis. We thank Glenn Cockburn and María Moirón for their constructive criticism of previous versions of the manuscript.

### **Funding**

The study was funded by the Max Planck Society (to MH). LM was supported by the International Max Planck Research School (IMPRS) for Organismal Biology. MNA acknowledges funding from the Swedish Research Council FORMAS (grant 217-2014-689).

### **Authors' contributions**

LM conceived the study, conducted the field work, analyzed the data and drafted the manuscript. LM and MH designed the study with input from WG and CI. LM and MT conducted egg and steroid analysis. CI and MNA supervised the antioxidant and fatty acid extractions and analyses. MH, WG, CI and MNA contributed to manuscript preparation. All authors approved of the final version of the manuscript.

### **Conflicts of interests**

The authors declare that they have no competing interests.

### **Permits**

All experimental procedures were conducted according to the legal requirements in Germany and were approved by the governmental authorities of Oberbayern, Germany (license number 55.2-1-54-2532-25-2015).

## 655 **References**

656

657 Alonso-Alvarez, C., Bertrand, S., Faivre, B., Chastel, O. and Sorci, G. 2007. Testosterone and  
658 oxidative stress: the oxidation handicap hypothesis. - Proc. R. Soc. London B Biol. Sci. 274: 819–825.

659

660 Andersson, M. N., Wang, H. L., Nord, A., Salmón, P. and Isaksson, C. 2015. Composition of  
661 physiologically important fatty acids in great tits differs between urban and rural populations on a  
662 seasonal basis. - Front. Ecol. Evol. 3: 93.

663

664 Araya-Ajoy, Y. G., Mathot, K. J. and Dingemanse, N. J. 2015. An approach to estimate short-term,  
665 long-term and reaction norm repeatability. - Methods Ecol. Evol. 6: 1462–1473.

666

667 Blount, J. D., Surai, P. F., Nager, R. G., Houston, D. C., Møller, A. P., Trewby, M. L. and Kennedy,  
668 M. W. 2002. Carotenoids and egg quality in the lesser blackbacked gull *Larus fuscus*: a supplemental  
669 feeding study of maternal effects. - Proc. Biol. Sci. 269: 29–36.

670

671 Boake, C. R. B. 1989. Repeatability: Its role in evolutionary studies of mating behavior. - Evol. Ecol.  
672 3: 173–182.

673

674 Bourgault, P., Thomas, D. W., Blondel, J., Perret, P. and Lambrechts, M. M. 2007. Between-  
675 population differences in egg composition in Blue Tits (*Cyanistes caeruleus*). - Can. J. Zool. 85: 71–  
676 80.

677

678 Dingemanse, N. J., Kazem, A. J. N., Réale, D. and Wright, J. 2010. Behavioural reaction norms:  
679 animal personality meets individual plasticity. - Trends Ecol. Evol. 25: 81–89.

680

681 Dingemanse, N. J., Bouwman, K. M., van de Pol, M., van Overveld, T., Patrick, S. C., Matthysen, E.  
682 and Quinn, J. L. 2012. Variation in personality and behavioural plasticity across four populations of  
683 the great tit *Parus major*. - J. Anim. Ecol. 81: 116–126.

684

685 Dingemanse, N. J. and Wolf, M. 2013. Between-individual differences in behavioural plasticity within  
686 populations: causes and consequences. - Anim. Behav. 85: 1031–1039.

687

688 Eikenaar, C., Källstig, E., Andersson, M. N., Herrera-Dueñas, A. and Isaksson, C. 2017. Oxidative  
689 Challenges of Avian Migration: A Comparative Field Study on a Partial Migrant. - Physiol. Biochem.  
690 Zool. 90: 223–229.

691

- 692 Gelman, A. and Hill, J. 2007. Data analysis using regression and multilevel/hierarchical models. -  
693 Cambridge University Press.  
694
- 695 Gil, D. 2008. Chapter 7 Hormones in Avian Eggs: Physiology, Ecology and Behavior. - Advances in  
696 the Study of Behavior. 38: 337-398.  
697
- 698 Giordano, M., Groothuis, T. G. G. and Tschirren, B. 2014. Interactions between prenatal maternal  
699 effects and posthatching conditions in a wild bird population. - Behav. Ecol. 25: 1459–1466.  
700
- 701 Giraudeau, M. and Ducatez, S. 2016. Co-adjustment of yolk antioxidants and androgens in birds. -  
702 Biol. Lett. 12: 20160676.  
703
- 704 Goymann, W., Wittenzellner, A., Schwabl, I. and Makomba, M. 2008. Progesterone modulates  
705 aggression in sex-role reversed female African black coucals. - Proc. R. Soc. London B Biol. Sci. 275:  
706 1053–1060.  
707
- 708 Groothuis, T. G. G. and Schwabl, H. 2002. Determinants of within- and among-clutch variation in  
709 levels of maternal hormones in Black-Headed Gull eggs. - Funct. Ecol. 16: 281–289.  
710
- 711 Groothuis, T. G. G., Müller, W., von Engelhardt, N., Carere, C. and Eising, C. 2005. Maternal  
712 hormones as a tool to adjust offspring phenotype in avian species. - Neurosci. Biobehav. Rev. 29:  
713 329–352.  
714
- 715 Groothuis, T. G. G. and Schwabl, H. 2008. Hormone-mediated maternal effects in birds: mechanisms  
716 matter but what do we know of them? - Philos. Trans. R. Soc. London B Biol. Sci. 363: 1647–1661.  
717
- 718 Groothuis, T. G. G., Carere, C., Lipar, J., Drent, P. J. and Schwabl, H. 2008. Selection on personality  
719 in a songbird affects maternal hormone levels tuned to its effect on timing of reproduction. - Biol. Lett.  
720 4: 465–467.  
721
- 722 Haussmann, M. F., Longenecker, A. S., Marchetto, N. M., Juliano, S. A. and Bowden, R. M. 2012.  
723 Embryonic exposure to corticosterone modifies the juvenile stress response, oxidative stress and  
724 telomere length. - Proc. R. Soc. London B Biol. Sci. 279: 1447–1456.  
725
- 726 Holtmann, B., Lagisz, M. and Nakagawa, S. 2017. Metabolic rates, and not hormone levels, are a  
727 likely mediator of between-individual differences in behaviour: a meta-analysis. - Funct. Ecol. 31:  
728 685–696.

729  
730 Hõrak, P., Surai, P.F., and Møller, A. P. 2002. Fat-soluble antioxidants in the eggs of great tits *Parus*  
731 *major* in relation to breeding habitat and laying sequence. - Avian Sci. 2: 123–130.  
732  
733 Hulbert, A. J. and Abbott, S. K. 2011. Nutritional ecology of essential fatty acids: an evolutionary  
734 perspective. - Aust. J. Zool. 59: 369.  
735  
736 Isaksson, C. and Andersson, S. 2007. Carotenoid diet and nestling provisioning in urban and rural  
737 great tits *Parus major*. - J. Avian Biol. 38: 564–572.  
738  
739 Isaksson, C., Hanson, M. A. and Burdge, G. C. 2015. The effects of spatial and temporal ecological  
740 variation on fatty acid compositions of wild great tits *Parus major*. - J. Avian Biol. 46: 245–253.  
741  
742 Isaksson, C., Andersson, M. N., Nord, A., von Post, M. and Wang, H.L. 2017. Species-dependent  
743 effects of the urban environment on fatty acid composition and oxidative stress in birds. - Front. Ecol.  
744 Evol. 5: 44.  
745  
746 Korner-Nievergelt, F., Roth, T., von Felten, S., Guélat, J., Almasi, B. and Korner-Nievergelt, P. 2015.  
747 Bayesian data analysis in ecology using linear models with R, BUGS, and Stan. Elsevier Science.  
748  
749 Larsson, S. C., Kumlin, M., Ingelman-Sundberg, M. and Wolk, A. 2004. Dietary long-chain n-3 fatty  
750 acids for the prevention of cancer: a review of potential mechanisms. - Am. J. Clin. Nutr. 79: 935–45.  
751  
752 Lessells, C. M., Dingemanse, N. J. and Both, C. 2002. Egg weights, egg components weights, and  
753 laying gaps in great tits (*Parus major*) in relation to ambient temperature. - Auk 119: 1091.  
754  
755 Lessells, C. M., Ruuskanen, S. and Schwabl, H. 2016. Yolk steroids in great tit *Parus major* eggs:  
756 variation and covariation between hormones and with environmental and parental factors. - Behav.  
757 Ecol. Sociobiol. 70: 843–856.  
758  
759 Lin, D. S., Connor, W. E. and Anderson, G. J. 1991. The incorporation of n-3 and n-6 essential fatty  
760 acids into the chick embryo from egg yolks having vastly different fatty acid compositions. - Pediatr.  
761 Res. 29: 601–605.  
762  
763 Martin, J. G. A., Nussey, D. H., Wilson, A. J. and Réale, D. 2011. Measuring individual differences in  
764 reaction norms in field and experimental studies: a power analysis of random regression models. -  
765 Methods Ecol. Evol. 2: 362–374.

766  
767 Meyers, L. A. and Bull, J. 2002. Fighting change with change: adaptive variation in an uncertain  
768 world. - *Trends Ecol. Evol.* 17: 551–557.  
769  
770 Møller, A. P., Biard, C., Blount, J. D., Houston, D. C., Ninni, P., Saino, N. and Surai, P. 2000.  
771 Carotenoid-dependent signals: indicators of foraging efficiency, immunocompetence or detoxification  
772 ability? - *Avian Poult. Biol. Rev.* 11: 137–159.  
773  
774 Mousseau, T. A. and Fox, C. W. 1998. The adaptive significance of maternal effects. - *Trends Ecol.*  
775 *Evol.* 13: 403–407.  
776  
777 Müller, W., Lessells, C., Korsten, P. and von Engelhardt, N. 2007. Manipulative signals in family  
778 conflict? On the function of maternal yolk hormones in birds. - *Am. Nat.* 169: E84–E96.  
779  
780 Nakagawa, S. and Schielzeth, H. 2010. Repeatability for Gaussian and non-Gaussian data: a practical  
781 guide for biologists. - *Biol. Rev.* 85: 935–956.  
782  
783 Noble, R. C. and Cocchi, M. 1990. Lipid metabolism and the neonatal chicken. - *Prog. Lipid Res.* 29:  
784 107–140.  
785  
786 Nussey, D. H., Wilson, A. J. and Brommer, J. E. 2007. The evolutionary ecology of individual  
787 phenotypic plasticity in wild populations. - *J. Evol. Biol.* 20: 831–844.  
788  
789 Pamplona, R., Barja, G. and Portero-Otín, M. 2002. Membrane fatty acid unsaturation, protection  
790 against oxidative stress, and maximum life span. - *Ann. N. Y. Acad. Sci.* 959: 475–490.  
791  
792 Parolini, M., Khorrauli, L., Possenti, C. D., Colombo, G., Caprioli, M., Santagostino, M., Nergadze, S.  
793 G., Milzani, A., Giulotto, E. and Saino, N. 2017. Yolk vitamin E prevents oxidative damage in gull  
794 hatchlings. - *R. Soc. Open Sci.* 220: 625-633.  
795  
796 Peig, J. and Green, A. J. 2009. New perspectives for estimating body condition from mass/length data:  
797 the scaled mass index as an alternative method. - *Oikos* 118: 1883–1891.  
798  
799 Pigliucci, M. 2001. *Phenotypic Plasticity: Beyond Nature and Nurture*. John Hopkins University Press,  
800 Baltimore.  
801

- 802 Pigliucci, M. 2005. Evolution of phenotypic plasticity: where are we going now? - Trends Ecol. Evol.  
803 20: 481–486.  
804
- 805 Pitk, M., Tilgar, V., Kilgas, P., and Mänd, R. 2012. Acute stress affects the corticosterone level in bird  
806 eggs: a case study with great tits (*Parus major*). - Horm. Behav. 62: 475-479.  
807
- 808 Price, E. R., Krokfors, A. and Guglielmo, C. G. 2008. Selective mobilization of fatty acids from  
809 adipose tissue in migratory birds. - J. Exp. Biol. 211: 29–34.  
810
- 811 R Core Team. 2017. R: A language and environment for statistical computing. R Foundation for  
812 Statistical Computing, Vienna, Austria. URL <https://www.R-project.org/>.  
813
- 814 Raclot, T. 2003. Selective mobilization of fatty acids from adipose tissue triacylglycerols. - Prog.  
815 Lipid Res. 42: 257–288.  
816
- 817 Remeš, V. 2011. Yolk androgens in great tit eggs are related to male attractiveness, breeding density  
818 and territory quality. - Behav. Ecol. Sociobiol. 65: 1257–1266.  
819
- 820 Royama, T. 1970. Factors Governing the Hunting Behaviour and Selection of Food by the Great Tit  
821 (*Parus major L.*). -J. Anim. Ecol. 39: 619–668.  
822
- 823 Royle, N. J., Surai, P. F., McCartney, R. J. and Speake, B. K. 1999. Parental investment and egg yolk  
824 lipid composition in gulls. - Funct. Ecol. 13: 298–306.  
825
- 826 Royle N. J, Surai P. F, and Hartley I. R. 2001. Maternally derived androgens and antioxidants in bird  
827 eggs: complementary but opposing effects? -Behav. Ecol. 12: 381–385.  
828
- 829 Royle, N. J., Surai, P. F. and Hartley, I. R. 2003. The effect of variation in dietary intake on maternal  
830 deposition of antioxidants in zebra finch eggs. - Funct. Ecol. 17: 472–481.  
831
- 832 Rubolini, D., Romano, M., Navara, K. J., Karadas, F., Ambrosini, R., Caprioli, M. and Saino, N. 2011.  
833 Maternal effects mediated by egg quality in the Yellow-legged Gull *Larus michahellis* in relation to  
834 laying order and embryo sex. - Front. Zool. 8: 24.  
835
- 836 Ruuskanen, S., Gienapp, P., Groothuis, T. G. G., Schaper, S. V., Darras, V. M., Pereira, C., de Vries,  
837 B. and Visser, M. E. 2016. Heritable variation in maternally derived yolk androgens, thyroid hormones  
838 and immune factors. - Heredity, 117, 184-190.

839

840 Ruuskanen S., Groothuis T. G. G., Baugh A. T., Schaper S. V., de Vries B., van Oers K. 2018.  
841 Maternal egg hormones in the mating context: The effect of pair personality. – *Funct. Ecol.* 32:439–  
842 449.

843

844 Saino, N., Bertacche, V., Ferrari, R. P., Martinelli, R., Moller, A. P. and Stradi, R. 2002. Carotenoid  
845 concentration in barn swallow eggs is influenced by laying order, maternal infection and paternal  
846 ornamentation. - *Proc. R. Soc. Lond. B Biol. Sci.* 269: 1729–1733.

847

848 Saino, N., Ferrari, R., Romano, M., Martinelli, R. and Møller, A.P. 2003. Experimental manipulation  
849 of egg quality affects immunity of barn swallow nestlings. - *Proc. R. Soc. Lond. B Biol. Sci.* 270:  
850 2485–2489.

851

852 Saino, N., Romano, M., Ferrari, R. P., Martinelli, R. and Möller, A.P. 2005. Stressed mothers lay eggs  
853 with high corticosterone levels which produce low-quality offspring. - *J. Exp. Zool.* 303A: 998-1006.

854

855 Schielzeth, H. and Forstmeier, W. 2009. Conclusions beyond support: overconfident estimates in  
856 mixed models. - *Behav. Ecol.* 20: 416–420.

857

858 Schwabl, H. 1993. Yolk is a source of maternal testosterone for developing birds. - *Proc. Natl. Acad.*  
859 *Sci.* 90: 11446–11450.

860

861 Surai, P. F. 2000. Effect of selenium and vitamin E content of the maternal diet on the antioxidant  
862 system of the yolk and the developing chick. – *Br. Poult. Sci.* 41: 235-243.

863

864 Surai, P. F., Speake, B. K. and Sparks, N. H. C. 2001. Carotenoids in avian nutrition and embryonic  
865 development. 1. Absorption, availability and levels in plasma and egg yolk. - *J. Poult. Sci.* 38: 1–27.

866

867 Surai, P. F. 2002. Natural antioxidants in avian nutrition and reproduction. Nottingham University  
868 Press, Nottingham, UK.

869

870 Surai, P. F. and Speake, B. K. 2008. The natural fatty acid compositions of eggs of wild birds and the  
871 consequences of domestication. - In: *Wild-Type Food in Health Promotion and Disease Prevention.*  
872 *Humana Press.* 2: 121–137.

873



- 874 Toledo, A., Andersson, M. N., Wang, H.-L., Salmón, P., Watson, H., Burdge, G. C. and Isaksson, C.  
875 2016. Fatty acid profiles of great tit (*Parus major*) eggs differ between urban and rural habitats, but  
876 not between coniferous and deciduous forests. - *Sci. Nat.* 103: 55.  
877
- 878 Török, J., Hargitai, R., Hegyi, G., Matus, Z., Michl, G., Péczely, P., Rosivall, B. and Tóth, G. 2007.  
879 Carotenoids in the egg yolks of collared flycatchers (*Ficedula albicollis*) in relation to parental quality,  
880 environmental factors and laying order. - *Behav. Ecol. Sociobiol.* 61: 541–550.  
881
- 882 Treidel, L. A., Whitley, B. N., Benowitz-Fredericks, Z. M. and Haussmann, M. F. 2013. Prenatal  
883 exposure to testosterone impairs oxidative damage repair efficiency in the domestic chicken (*Gallus*  
884 *gallus*). - *Biol. Lett.* 9: 20130684.  
885
- 886 Tschirren, B., Richner, H. and Schwabl, H. 2004. Ectoparasite–modulated deposition of maternal  
887 androgens in great tit eggs. - *Proc. R. Soc. London B Biol. Sci.* 271: 1371–1375.  
888
- 889 Tschirren, B., Sendecka, J., Groothuis, T. G. G., Gustafsson, L. and Doligez, B. 2009. Heritable  
890 variation in maternal yolk hormone transfer in a wild bird population. - *Am. Nat.* 174: 557–64.  
891
- 892 Twining, C. W., Brenna, J. T., Lawrence, P., Shipley, J. R., Tollefson, T. N. and Winkler, D. W. 2016.  
893 Omega-3 long-chain polyunsaturated fatty acids support aerial insectivore performance more than  
894 food quantity. - *Proc. Natl. Acad. Sci. U. S. A.* 113: 10920–5.  
895
- 896 Via, S., Gomulkiewicz, R., Dejong, G., Scheiner, S. M., Schlichting, C. D. and Vantienderen, P. H.  
897 1995. Adaptive phenotypic plasticity – consensus and controversy. - *Trends Ecol. Evol.* 10: 212–217.  
898
- 899 van de Pol, M. 2012. Quantifying individual variation in reaction norms: how study design affects the  
900 accuracy, precision and power of random regression models. - *Methods Ecol. Evol.* 3: 268–280.  
901
- 902 Walsberg, G. E. 1983. Avian ecological energetics. In *Avian Biology*; vol. VII, (eds. D. S. Farner, J.  
903 R. King, and K. C. Parkes. 161–220. Academic Press, New York.  
904
- 905 Watson, H., Salmón, P. and Isaksson, C. 2018. Maternally derived yolk antioxidants buffer the  
906 developing avian embryo against oxidative stress induced by hyperoxia. - *J. Exp. Biol.* 221:  
907 jeb179465.  
908
- 909 Williamson, K. A., Surai, P. F., and Graves, J. A. 2006. Yolk antioxidants and mate attractiveness in  
910 the Zebra Finch. - *Funct. Ecol.* 20: 354–359.

911  
912  
913  
914  
915  
916  
917  
918  
919  
920  
921  
922  
923  
924  
925  
926  
927  
928  
929  
930  
931  
932  
933  
934  
935  
936  
937  
938  
939  
940  
941  
942  
943  
944  
945  
946  
947

Wilson, D. S. 1998. Adaptive individual differences within single populations. - *Phil. Trans. R. Soc. Lond. B.* 353: 199–205.

Wingfield, J. C. and Farner, D. S. 1976. *Avian Endocrinology: Field Investigations and Methods.* – *Condor.*78: 570.

Yigit, A. A., Panda, A. K. and Cherian, G. 2014. The avian embryo and its antioxidant defence system. *Worlds. -Poult. Sci. J.* 70: 563–574.

948 **Figures and tables**

949

950 **Figure 1** | Schematical depiction of the two levels of analysis used in this study to understand female  
951 yolk allocation in avian species that produce clutches of more than one egg. (a) The mean phenotypic  
952 plasticity (i.e., average population variation) along the laying sequence can be caused by variation  
953 among females. (b) Females (individuals represented by different solid lines) can vary in the mean  
954 allocation of yolk components, (c) in the individual phenotypic plasticity (i.e., slope of allocation  
955 along the laying sequence), or (d) in both the mean and slope of allocation. In the latter case, the two  
956 parameters can also be positively or negatively correlated. For example, females that on average  
957 allocate a high concentration of a specific yolk component will more strongly decrease the  
958 concentration of that component along the laying sequence ((d); upper line).

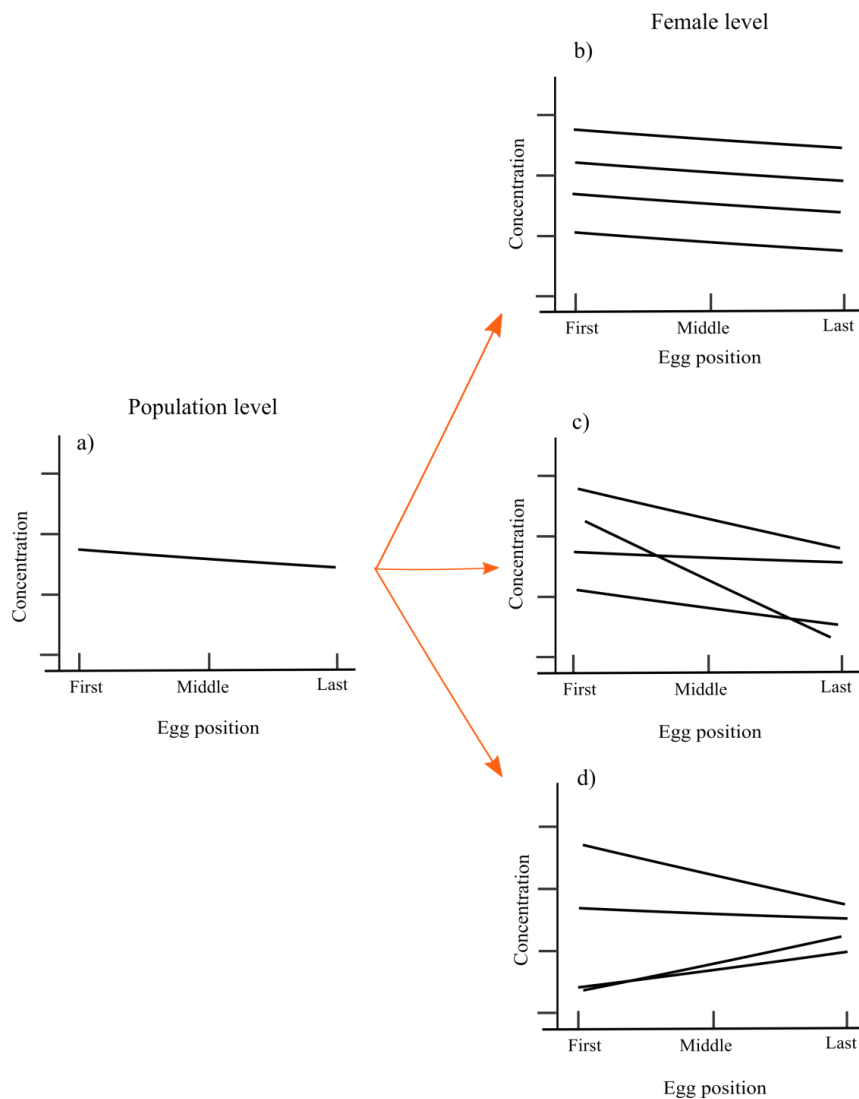

959 **Table 1**| Results from linear mixed-effects models estimating fixed and random effects to explain variation in yolk components and variation among females. Egg  
960 position, lay date and mean ambient temperature were fitted as covariates, and random slopes were fitted for female identity with respect to egg position. We  
961 present fixed ( $\beta$ ) and random ( $\sigma^2$ ) parameters with their 95% credible intervals (CrI) in brackets. All explanatory variables were mean centered; hence the  
962 intercepts refer to the average value of covariates. Fixed factors with a statistically meaningful effect (i.e., if zero is not included within the 95% CrI) are  
963 presented in bold. Estimates and CrI of ‘0.00’ represent an effect smaller than 0.01.

964

965 <sup>a</sup> A4, androstenedione; DHT, 5 $\alpha$ -dihydrotestosterone; Testo, testosterone; Cort, corticosterone.

966 A4 and DHT concentrations were log<sub>10</sub> transformed.

967 <sup>b</sup> Vit E, vitamin E; Lut, lutein; Zea, zeaxanthin; Carot, sum of lutein and zeaxanthin.

968 All antioxidant concentrations were square root transformed.

969 <sup>c</sup> SFA, saturated fatty acids; MUFA, monounsaturated fatty acids; PUFA polyunsaturated fatty acids.

970 All fatty acid proportions were logit transformed; the total  $\omega$ -6/total  $\omega$ -3 PUFA ratios were log<sub>10</sub> transformed.

971 <sup>d</sup> Egg number corrected by total clutch size.

972 <sup>e</sup> Date of first egg laid.

973 <sup>f</sup> Mean ambient temperature for the 3 days prior to the lay date of each egg.

974 <sup>g</sup> Total amount of variation in reaction norm elevation among-females.

975 <sup>h</sup> Total amount of variation in reaction norm slopes among-females.

976 <sup>i</sup> Elevation-slope correlation.

977

|                                       | Steroid hormones <sup>a</sup>                   |                                                 |                                                  |                                                 | Antioxidants <sup>b</sup>                       |                                                 |                                                 |                                                  | Fatty acids <sup>c</sup>                     |                                                 |                                              |                                                 |                                                 |
|---------------------------------------|-------------------------------------------------|-------------------------------------------------|--------------------------------------------------|-------------------------------------------------|-------------------------------------------------|-------------------------------------------------|-------------------------------------------------|--------------------------------------------------|----------------------------------------------|-------------------------------------------------|----------------------------------------------|-------------------------------------------------|-------------------------------------------------|
|                                       | A4                                              | DHT                                             | Testo                                            | Cort                                            | Vit E                                           | Lut                                             | Zea                                             | Carot                                            | SFA                                          | MUFA                                            | $\omega$ -3 PUFA                             | $\omega$ -6 PUFA                                | $\omega$ -6/ $\omega$ -3 PUFA                   |
| Fixed factors $\beta$ (95% CrI)       |                                                 |                                                 |                                                  |                                                 |                                                 |                                                 |                                                 |                                                  |                                              |                                                 |                                              |                                                 |                                                 |
| Intercept                             | 3.04<br>(2.92;<br>3.17)                         | 2.51<br>(2.34;<br>2.67)                         | 22.45<br>(18.35;<br>26.54)                       | 0.17<br>(0.14;<br>0.19)                         | 1.08<br>(0.91;<br>1.25)                         | 10.58<br>(8.51;<br>12.59)                       | 2.28<br>(1.79;<br>2.75)                         | 10.92<br>(8.79;<br>12.99)                        | -0.95<br>(-1.00; -<br>0.89)                  | -0.16<br>(-0.18;<br>-0.14)                      | -3.31<br>(-3.53;<br>-3.08)                   | -1.27<br>(-1.40;<br>-1.15)                      | 1.83<br>(1.52;<br>2.13)                         |
| Egg position <sup>d</sup>             | 0.01<br>(-0.05;<br>0.08)                        | <b>-0.08</b><br><b>(-0.14;</b><br><b>-0.01)</b> | 0.78<br>(-0.71;<br>2.28)                         | -0.00<br>(-0.02;<br>0.02)                       | <b>-0.14</b><br><b>(-0.22;</b><br><b>-0.07)</b> | <b>-1.29</b><br><b>(-2.11;</b><br><b>-0.47)</b> | <b>-0.22</b><br><b>(-0.42;</b><br><b>-0.02)</b> | <b>-1.30</b><br><b>(-2.13; -</b><br><b>0.45)</b> | <b>0.02</b><br><b>(0.00;</b><br><b>0.05)</b> | 0.01<br>(-0.00;<br>0.02)                        | 0.03<br>(-0.01;<br>0.08)                     | <b>-0.05</b><br><b>(-0.08;</b><br><b>-0.02)</b> | <b>-0.07</b><br><b>(-0.13;</b><br><b>-0.01)</b> |
| Lay date <sup>e</sup>                 | <b>0.13</b><br><b>(0.01;</b><br><b>0.24)</b>    | 0.07<br>(-0.08;<br>0.23)                        | 0.33<br>(-3.67;<br>4.38)                         | <b>-0.03</b><br><b>(-0.06;</b><br><b>-0.01)</b> | 0.00<br>(-0.16;<br>0.17)                        | 1.28<br>(-0.73;<br>3.30)                        | 0.18<br>(-0.30;<br>0.67)                        | 1.38<br>(-0.71;<br>3.45)                         | <b>0.07</b><br><b>(0.02;</b><br><b>0.13)</b> | -0.02<br>(-0.04;<br>0.01)                       | <b>0.26</b><br><b>(0.04;</b><br><b>0.48)</b> | <b>-0.16</b><br><b>(-0.29;</b><br><b>-0.04)</b> | <b>-0.38</b><br><b>(-0.69;</b><br><b>-0.08)</b> |
| Mean ambient temperature <sup>f</sup> | 0.02<br>(-0.04;<br>0.08)                        | 0.03<br>(-0.01;<br>0.08)                        | 1.17<br>(-0.56;<br>2.91)                         | <b>-0.02</b><br><b>(-0.04;</b><br><b>-0.00)</b> | 0.05<br>(-0.03;<br>0.13)                        | 0.37<br>(-0.57;<br>1.28)                        | 0.08<br>(-0.14;<br>0.30)                        | 0.37<br>(-0.56;<br>1.29)                         | 0.00<br>(-0.01;<br>0.01)                     | <b>-0.01</b><br><b>(-0.02;</b><br><b>-0.00)</b> | -0.02<br>(-0.04;<br>0.01)                    | <b>0.01</b><br><b>(0.00;</b><br><b>0.03)</b>    | 0.03<br>(-0.01;<br>0.06)                        |
| Random factors $\sigma^2$ (95% CrI)   |                                                 |                                                 |                                                  |                                                 |                                                 |                                                 |                                                 |                                                  |                                              |                                                 |                                              |                                                 |                                                 |
| Among-female variance                 |                                                 |                                                 |                                                  |                                                 |                                                 |                                                 |                                                 |                                                  |                                              |                                                 |                                              |                                                 |                                                 |
| V elevation <sup>g</sup>              | 0.04<br>(0.02;<br>0.07)                         | 0.07<br>(0.05;<br>0.10)                         | 39.71<br>(23.26;<br>64.44)                       | 0.00<br>(0.00;<br>0.00)                         | 0.06<br>(0.03;<br>0.11)                         | 9.44<br>(5.10;<br>15.86)                        | 0.54<br>(0.29;<br>0.94)                         | 10.23<br>(5.27;<br>17.69)                        | 0.01<br>(0.01;<br>0.01)                      | 0.00<br>(0.00;<br>0.00)                         | 0.04<br>(0.04;<br>0.06)                      | 0.13<br>(0.11;<br>0.19)                         | 0.25<br>(0.22;<br>0.38)                         |
| V slopes <sup>h</sup>                 | 0.01<br>(0.01;<br>0.02)                         | 0.01<br>(0.01;<br>0.03)                         | 11.13<br>(8.88;<br>19.71)                        | 0.00<br>(0.00;<br>0.00)                         | 0.02<br>(0.02;<br>0.03)                         | 2.82<br>(2.28;<br>4.87)                         | 0.16<br>(0.13;<br>0.29)                         | 3.05<br>(2.55;<br>5.29)                          | 0.00<br>(0.00;<br>0.00)                      | 0.00<br>(0.00;<br>0.00)                         | 0.01<br>(0.00;<br>0.02)                      | 0.02<br>(0.01;<br>0.05)                         | 0.04<br>(0.03;<br>0.11)                         |
| Cor elevation-slopes <sup>i</sup>     | <b>-0.85</b><br><b>(-0.96;</b><br><b>-0.65)</b> | -0.21<br>(-0.56;<br>0.19)                       | <b>-0.89</b><br><b>(-0.97; -</b><br><b>0.72)</b> | -0.08<br>(-0.56;<br>0.43)                       | <b>0.86</b><br><b>(0.68;</b><br><b>0.97)</b>    | <b>-0.62</b><br><b>(-0.89;</b><br><b>-0.17)</b> | <b>-0.87</b><br><b>(-0.97;</b><br><b>-0.68)</b> | <b>-0.88</b><br><b>(-0.97; -</b><br><b>0.69)</b> | -0.21<br>(-0.52;<br>0.15)                    | <b>-0.68</b><br><b>(-0.90;</b><br><b>-0.31)</b> | -0.08<br>(-0.41;<br>0.29)                    | -0.15<br>(-0.44;<br>0.17)                       | -0.13<br>(-0.43;<br>0.22)                       |
| Residual variance                     | 0.07<br>(0.05;<br>0.09)                         | 0.03<br>(0.02;<br>0.04)                         | 52.22<br>(38.93;<br>69.93)                       | 0.004<br>(0.00;<br>0.01)                        | 0.11<br>(0.09;<br>0.16)                         | 14.58<br>(10.8;<br>19.65)                       | 0.89<br>(0.65;<br>1.19)                         | 15.42<br>(11.39;<br>20.81)                       | 0.00<br>(0.00;<br>0.00)                      | 0.00<br>(0.00;<br>0.00)                         | 0.00<br>(0.00;<br>0.00)                      | 0.01<br>(0.01;<br>0.01)                         | 0.01<br>(0.01;<br>0.02)                         |

978 **Figure 2** Mean phenotypic plasticity of steroid hormones (a-d), antioxidants (e-f), and fatty acids (g-j)  
979 along the laying sequence in great tit egg yolks. Egg position is provided as the egg number relative to  
980 total clutch size for each nest. Note that in all statistical analyses the laying sequence was included as a  
981 continuous variable and references in x-axis to egg position within the laying sequence are only for  
982 illustrative purposes. Filled circles show raw data for each egg; each colour indicates a different nest.  
983 The black solid line represents average concentrations or proportions of components, with 95%  
984 credible intervals indicated in grey shading. (b) DHT, 5 $\alpha$ -dihydrotestosterone; (e) Vitamin E,  $\alpha$ -  
985 tocopherol; (f) Carotenoids, sum of lutein and zeaxanthin; (g) SFA, saturated fatty acids; (h) MUFA,  
986 monounsaturated fatty acids; (i - j) PUFA, polyunsaturated fatty acids.

987 \* Statistically meaningful support for an effect of “egg position” on the yolk component  
988 concentration/proportion.

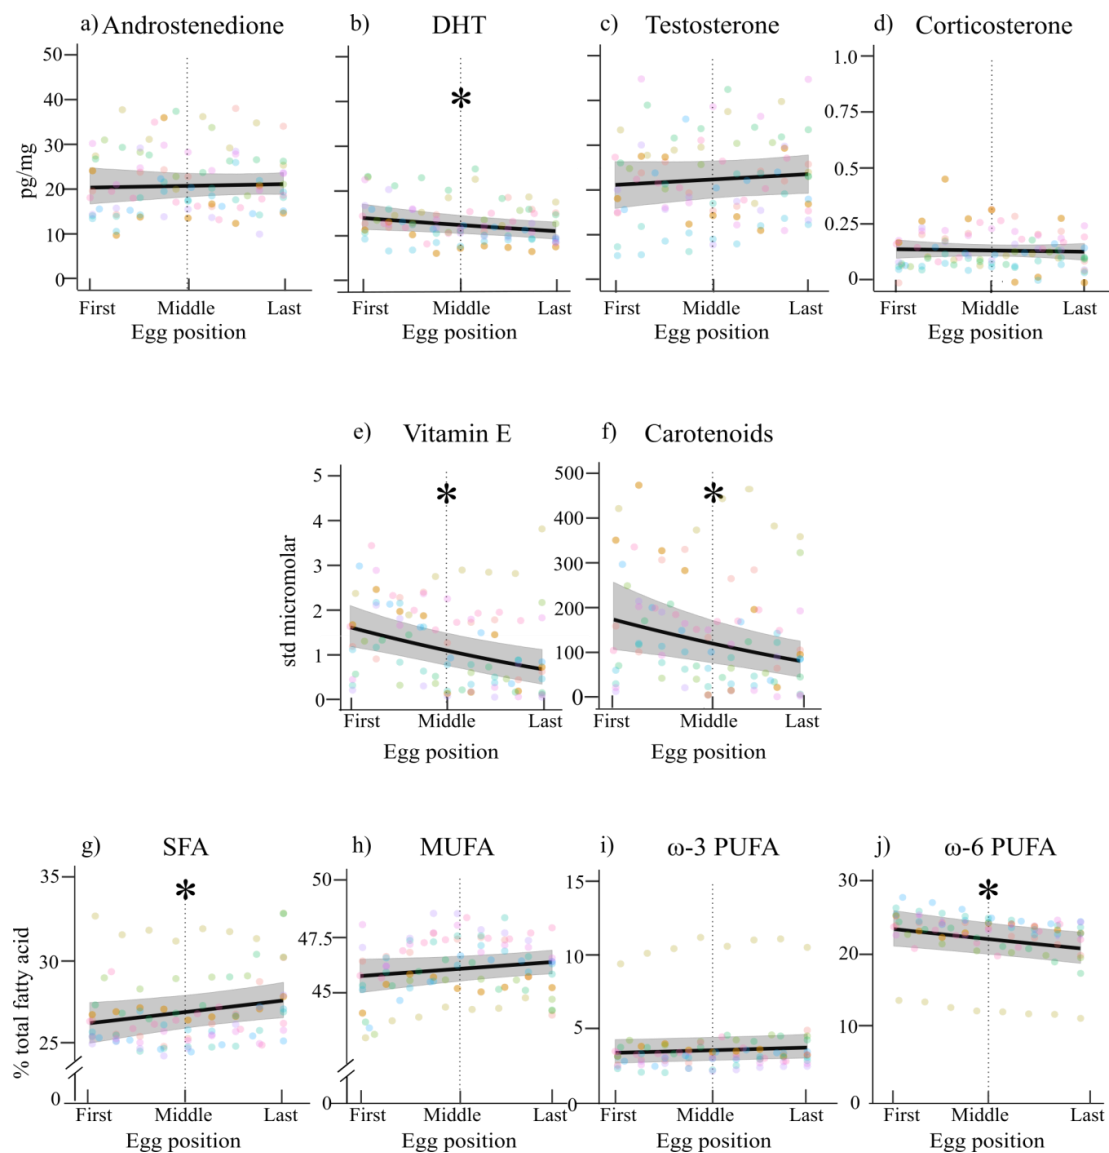

989 **Figure 3|** Reaction-norm plots of steroid hormones (a-b), antioxidants (c-d), and fatty acids (e),  
990 illustrating among-female variation in yolk allocation patterns along the laying sequence. Plots are  
991 shown only for those yolk components where elevation and slope of allocation  $n$  were correlated. Egg  
992 position is shown as the egg number relative to total clutch size for each nest. Note that in all statistical  
993 analyses the laying sequence was included as a continuous variable and references in x-axis to egg  
994 position within the laying sequence are only for illustrative purposes. Gray lines indicate different  
995 nests. Mean population concentrations or proportions of components (dashed black line) and 95%  
996 credible intervals (gray shading) are also shown as a reference. (c) Vitamin E,  $\alpha$ -tocopherol; (d)  
997 Carotenoids, sum of lutein and zeaxanthin; (e) MUFA, monounsaturated fatty acids.  
998  
999

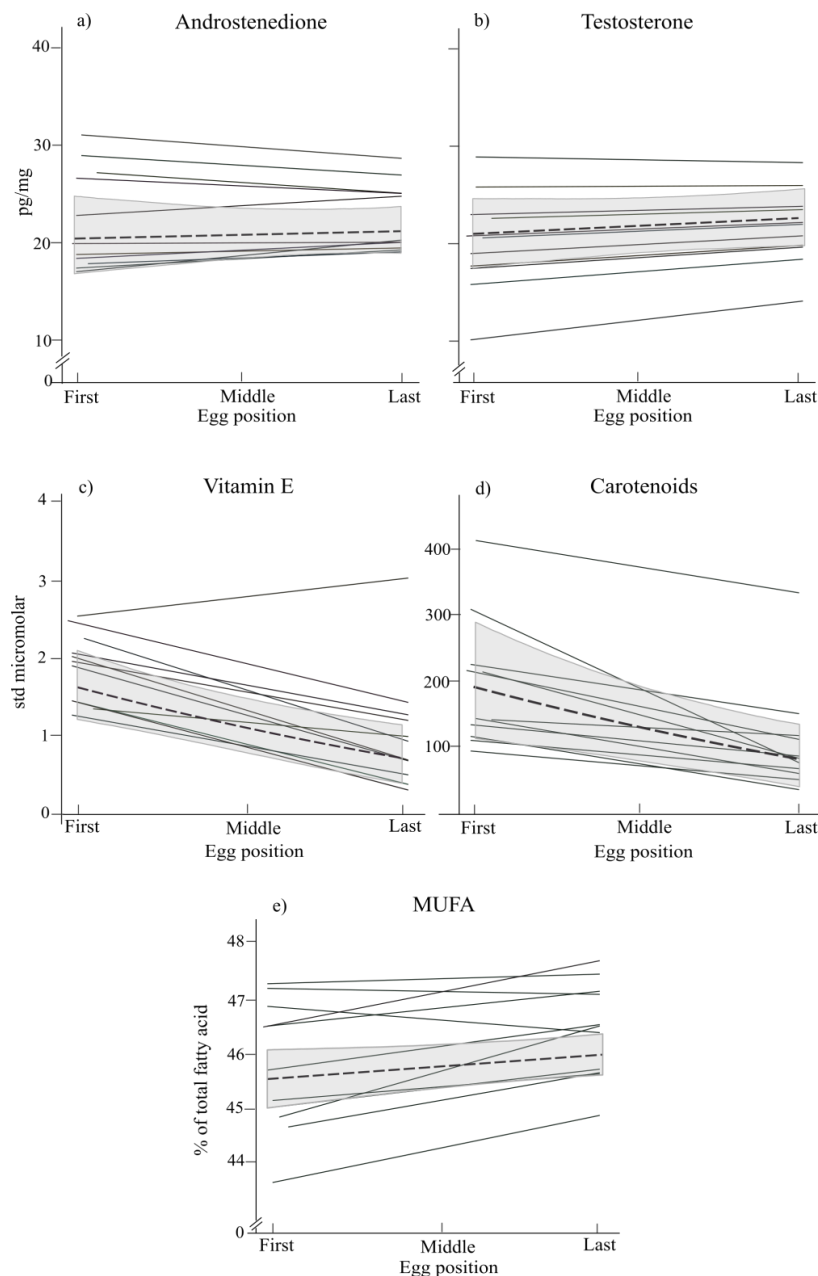

1000 **Figure 4** Adjusted repeatabilities of fatty acids (top), antioxidants (middle), and steroid hormones  
 1001 (bottom) of yolk components among females. Repeatability estimates (black circles in the graph and  
 1002 values in the left column of the table) and 95% credible intervals (CrI, horizontal lines in graph and  
 1003 numbers in right column of table) were obtained from linear mixed-effects models. Gray shading of  
 1004 increasing intensity indicates increases in repeatability. DHT, 5 $\alpha$ -dihydrotestosterone; Vitamin E,  $\alpha$ -  
 1005 tocopherol; SFA, saturated fatty acids; MUFA, monounsaturated fatty acids; PUFA polyunsaturated  
 1006 fatty acids.

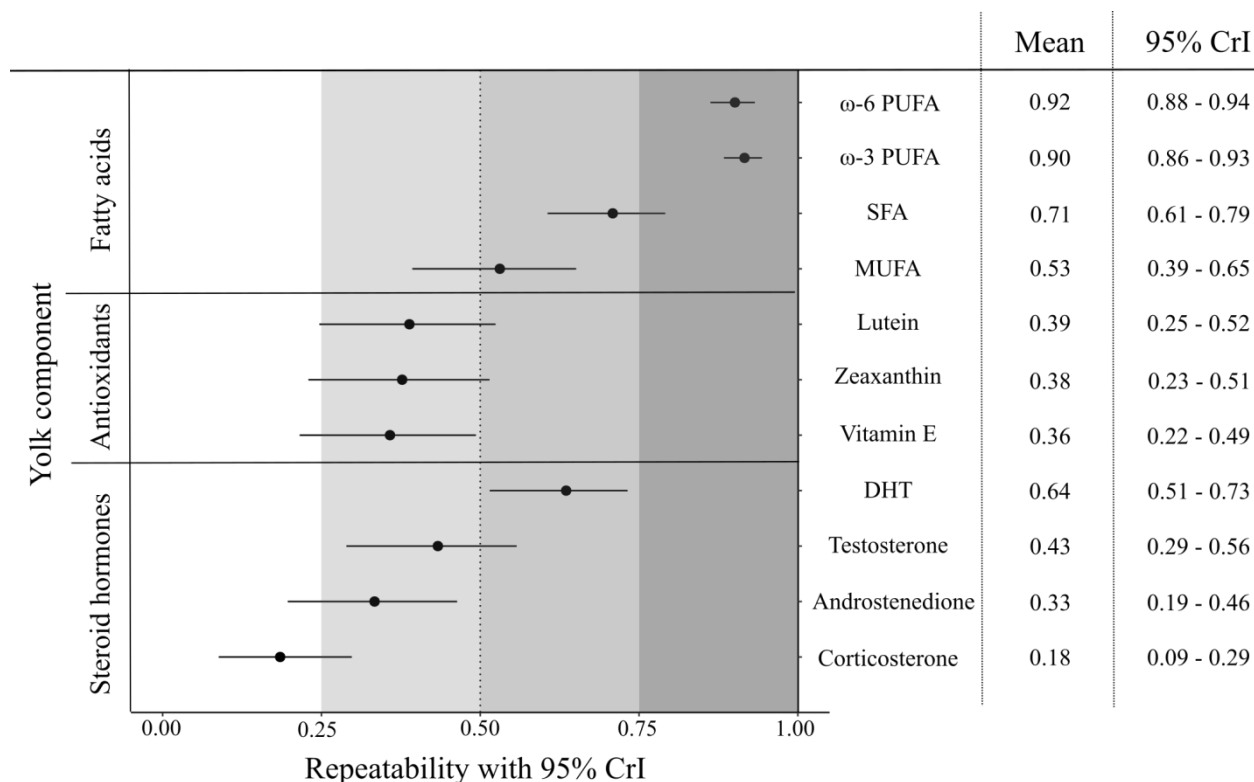

Source: https://www.biorxiv.org/content/10.1101/467258v1.full.pdf
